# Supplementary material
Source: PubMed Central journal article supplement (PMC4344968)
Supplement: NIHMS657867-supplement-4.pdf [file NIHMS657867-supplement-4.pdf]

### A. Neutralization of VSV/GP-Uganda

| Group | mAb   | Neutralization values |                        |                        | Curve fit values (R <sup>2</sup> ) |
|-------|-------|-----------------------|------------------------|------------------------|------------------------------------|
|       |       | EC <sub>50</sub>      | EC <sub>50</sub> lower | EC <sub>50</sub> upper |                                    |
| 1     | MR48  | >                     | >                      | >                      | 0.0                                |
|       | MR49  | >                     | >                      | >                      | 0.0                                |
|       | MR59  | >                     | >                      | >                      | 0.0                                |
|       | MR73  | >                     | >                      | >                      | 0.0                                |
|       | MR75  | >                     | >                      | >                      | 0.0                                |
|       | MR77  | >                     | >                      | >                      | 0.0                                |
|       | MR84  | >                     | 619                    | >                      | 0.1                                |
|       | MR85  | >                     | >                      | >                      | 0.0                                |
|       | MR114 | >                     | 940                    | >                      | 0.3                                |
|       | MR117 | >                     | 317                    | >                      | 0.4                                |
|       | MR168 | >                     | >                      | >                      | 0.5                                |
|       | MR187 | >                     | >                      | >                      | 0.0                                |
|       | MR237 | >                     | >                      | >                      | 0.0                                |
| 2     | MR228 | >                     | 442                    | >                      | 0.5                                |
|       | MR235 | >                     | >                      | >                      | 0.0                                |
| 3A    | MR162 | >                     | >                      | >                      | 0.5                                |
|       | MR221 | >                     | >                      | >                      | 0.0                                |
|       | MR224 | >                     | 865                    | >                      | 0.1                                |
|       | MR246 | >                     | >                      | >                      | 0.0                                |
| 3B    | MR65  | 224                   | 160                    | 343                    | 0.9                                |
|       | MR72  | 13                    | 6                      | 28                     | 0.8                                |
|       | MR78  | 7                     | 5                      | 10                     | 0.8                                |
|       | MR79  | >                     | >                      | >                      | 0.1                                |
|       | MR82  | 0                     | 0                      | 2                      | 0.9                                |
|       | MR103 | 28                    | 22                     | 34                     | 1.0                                |
|       | MR111 | 8                     | 3                      | 16                     | 0.8                                |
|       | MR137 | >                     | >                      | >                      | 0.0                                |
|       | MR144 | 37                    | 31                     | 45                     | 1.0                                |
|       | MR186 | 2                     | 1                      | 2                      | 1.0                                |
|       | MR191 | 6                     | 4                      | 10                     | 0.9                                |
|       | MR198 | 12                    | 9                      | 14                     | 1.0                                |
|       | MR201 | 8                     | 5                      | 11                     | 0.9                                |
|       | MR208 | 55                    | 44                     | 66                     | 1.0                                |
|       | MR209 | 12                    | 6                      | 21                     | 0.8                                |
|       | MR213 | 10                    | 6                      | 14                     | 0.9                                |
|       | MR229 | 7                     | 3                      | 12                     | 0.9                                |
|       | MR232 | 4                     | 3                      | 6                      | 0.9                                |
|       | MR238 | 10                    | 9                      | 12                     | 1.0                                |
|       | MR241 | 12                    | 6                      | 21                     | 0.9                                |

### B. Neutralization of MARV-Uganda

| Group | mAb   | Neutralization values |                        |                        | Curve fit values (R <sup>2</sup> ) |
|-------|-------|-----------------------|------------------------|------------------------|------------------------------------|
|       |       | EC <sub>50</sub>      | EC <sub>50</sub> lower | EC <sub>50</sub> upper |                                    |
| 1     | MR48  | >                     | >                      | >                      | 0.0                                |
|       | MR49  | >                     | >                      | >                      | 0.0                                |
|       | MR59  | >                     | 886                    | >                      | 0.6                                |
|       | MR73  | >                     | >                      | >                      | 0.0                                |
|       | MR75  | >                     | >                      | >                      | 0.0                                |
|       | MR77  | >                     | >                      | >                      | 0.0                                |
|       | MR84  | >                     | >                      | >                      | 0.2                                |
|       | MR85  | >                     | 909                    | >                      | 0.0                                |
|       | MR114 | >                     | >                      | >                      | 0.0                                |
|       | MR117 | >                     | 317                    | >                      | 0.4                                |
|       | MR168 | >                     | >                      | >                      | 0.0                                |
|       | MR187 | >                     | >                      | >                      | 0.0                                |
|       | MR237 | >                     | >                      | >                      | 0.0                                |
| 2     | MR228 | >                     | >                      | >                      | 0.0                                |
|       | MR235 | >                     | >                      | >                      | 0.0                                |
| 3A    | MR162 | >                     | >                      | >                      | 0.0                                |
|       | MR221 | >                     | 843                    | >                      | 0.1                                |
|       | MR224 | >                     | >                      | >                      | 0.0                                |
|       | MR246 | >                     | >                      | >                      | 0.0                                |
| 3B    | MR65  | >                     | >                      | >                      | 0.0                                |
|       | MR72  | 601                   | 225                    | >                      | 0.4                                |
|       | MR78  | 93                    | 55                     | 589                    | 0.5                                |
|       | MR79  | >                     | >                      | >                      | 0.0                                |
|       | MR82  | 288                   | 123                    | >                      | 0.6                                |
|       | MR103 | 291                   | 204                    | >                      | 0.7                                |
|       | MR111 | 414                   | 234                    | >                      | 0.7                                |
|       | MR137 | >                     | >                      | >                      | 0.0                                |
|       | MR144 | >                     | >                      | >                      | 0.2                                |
|       | MR186 | >                     | >                      | >                      | 0.0                                |
|       | MR191 | >                     | >                      | >                      | 0.0                                |
|       | MR198 | 206                   | 66                     | >                      | 0.5                                |
|       | MR201 | 572                   | 244                    | >                      | 0.5                                |
|       | MR208 | >                     | >                      | >                      | 0.0                                |
|       | MR209 | 402                   | 156                    | >                      | 0.6                                |
|       | MR213 | 305                   | 134                    | 895                    | 0.7                                |
|       | MR229 | 215                   | 75                     | >                      | 0.5                                |
| MR232 | 114   | 41                    | 489                    | 0.6                    |                                    |
| MR238 | >     | >                     | >                      | 0.0                    |                                    |
| MR241 | >     | 204                   | >                      | 0.2                    |                                    |
