# Supplementary material
Source: PubMed Central journal article supplement (PMC4344968)

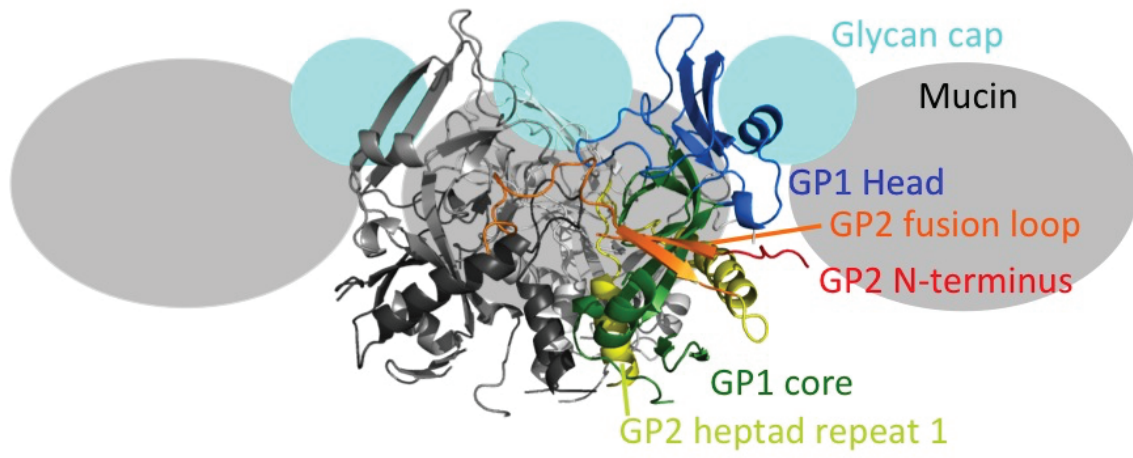

Supplement: NIHMS657867-supplement-1.pdf [file NIHMS657867-supplement-1.pdf]

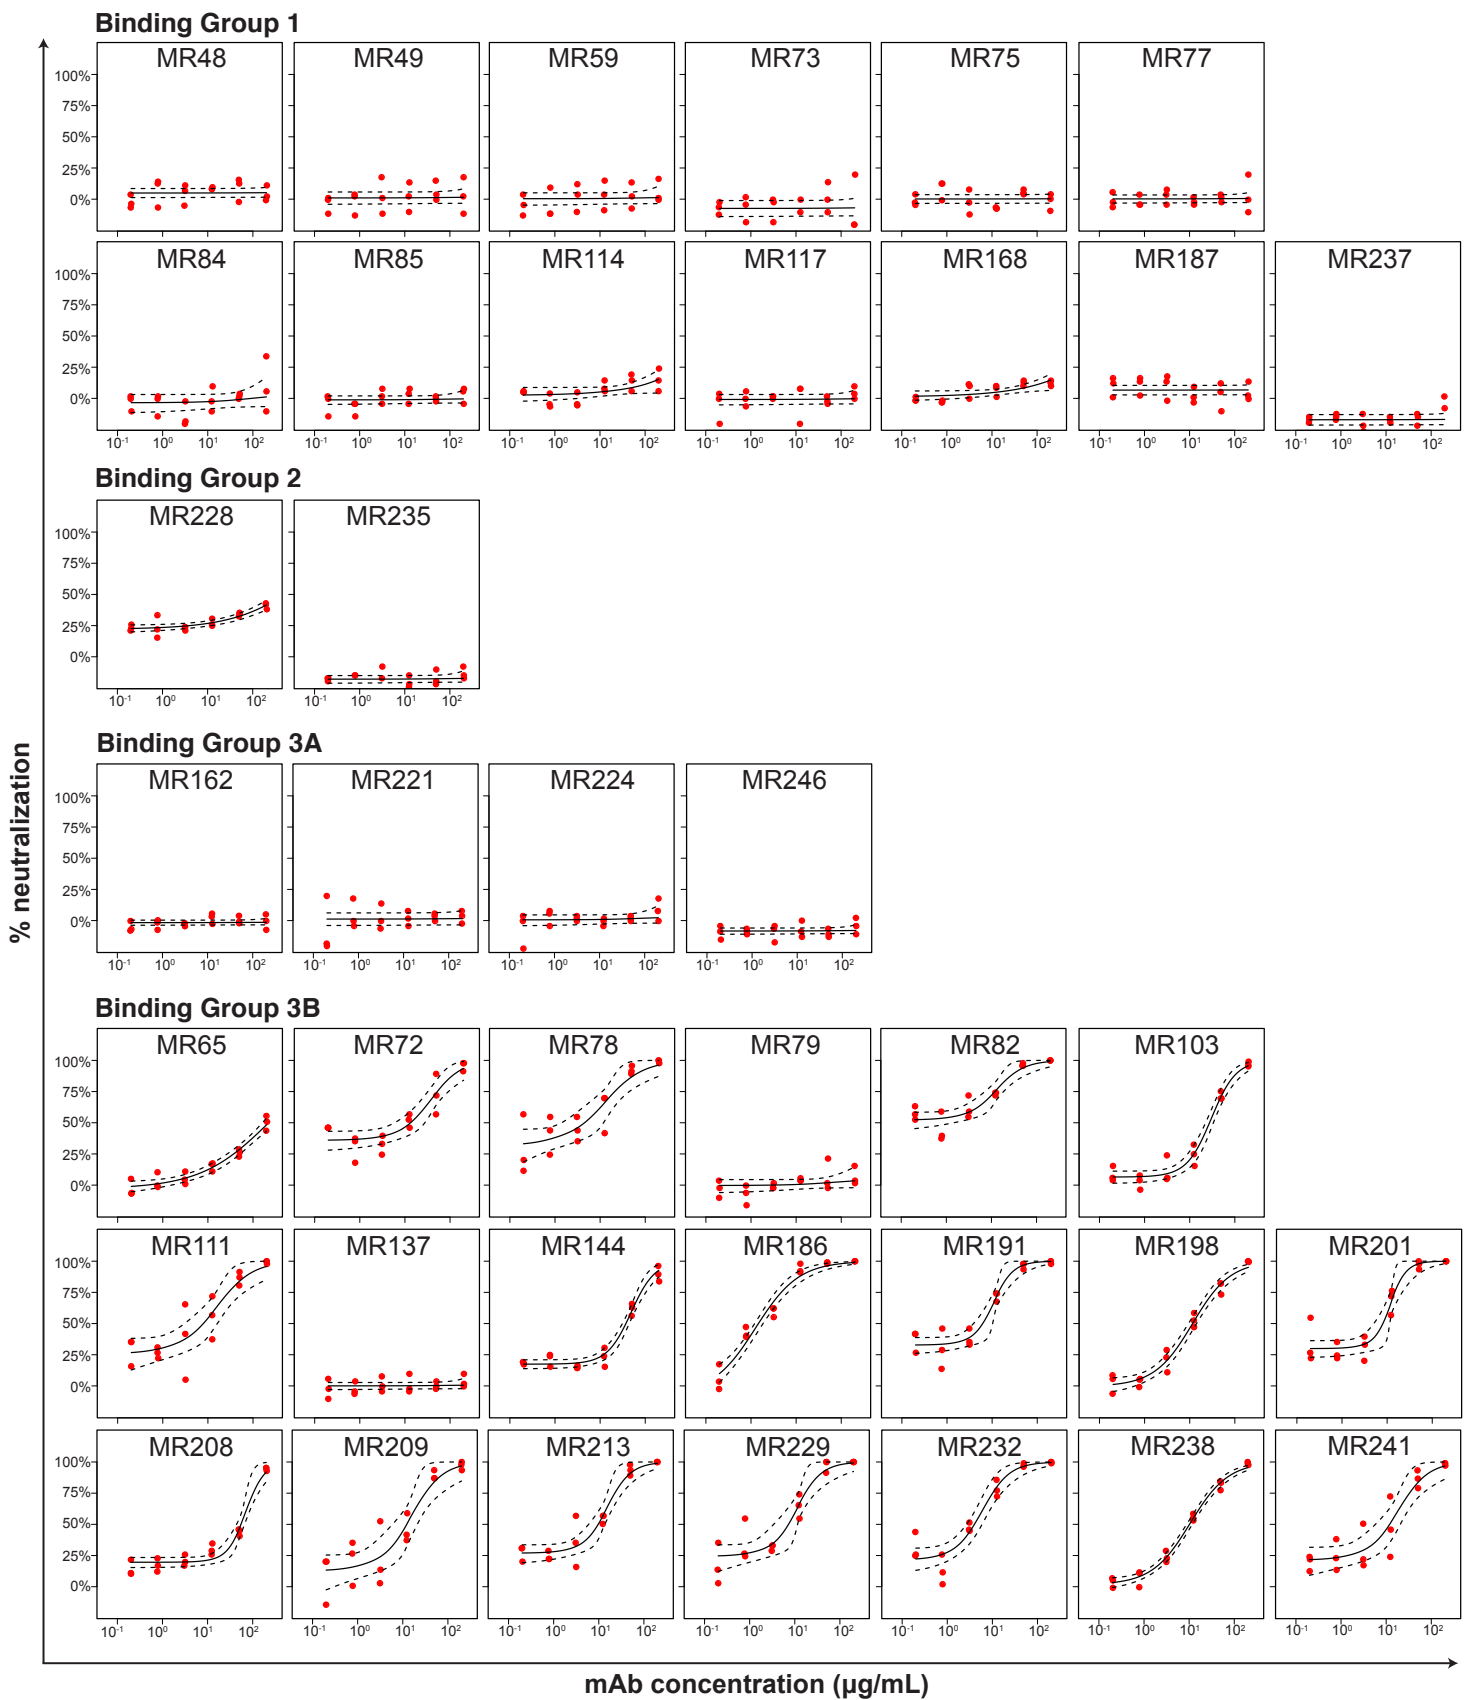

Supplement: NIHMS657867-supplement-2.pdf [file NIHMS657867-supplement-2.pdf]

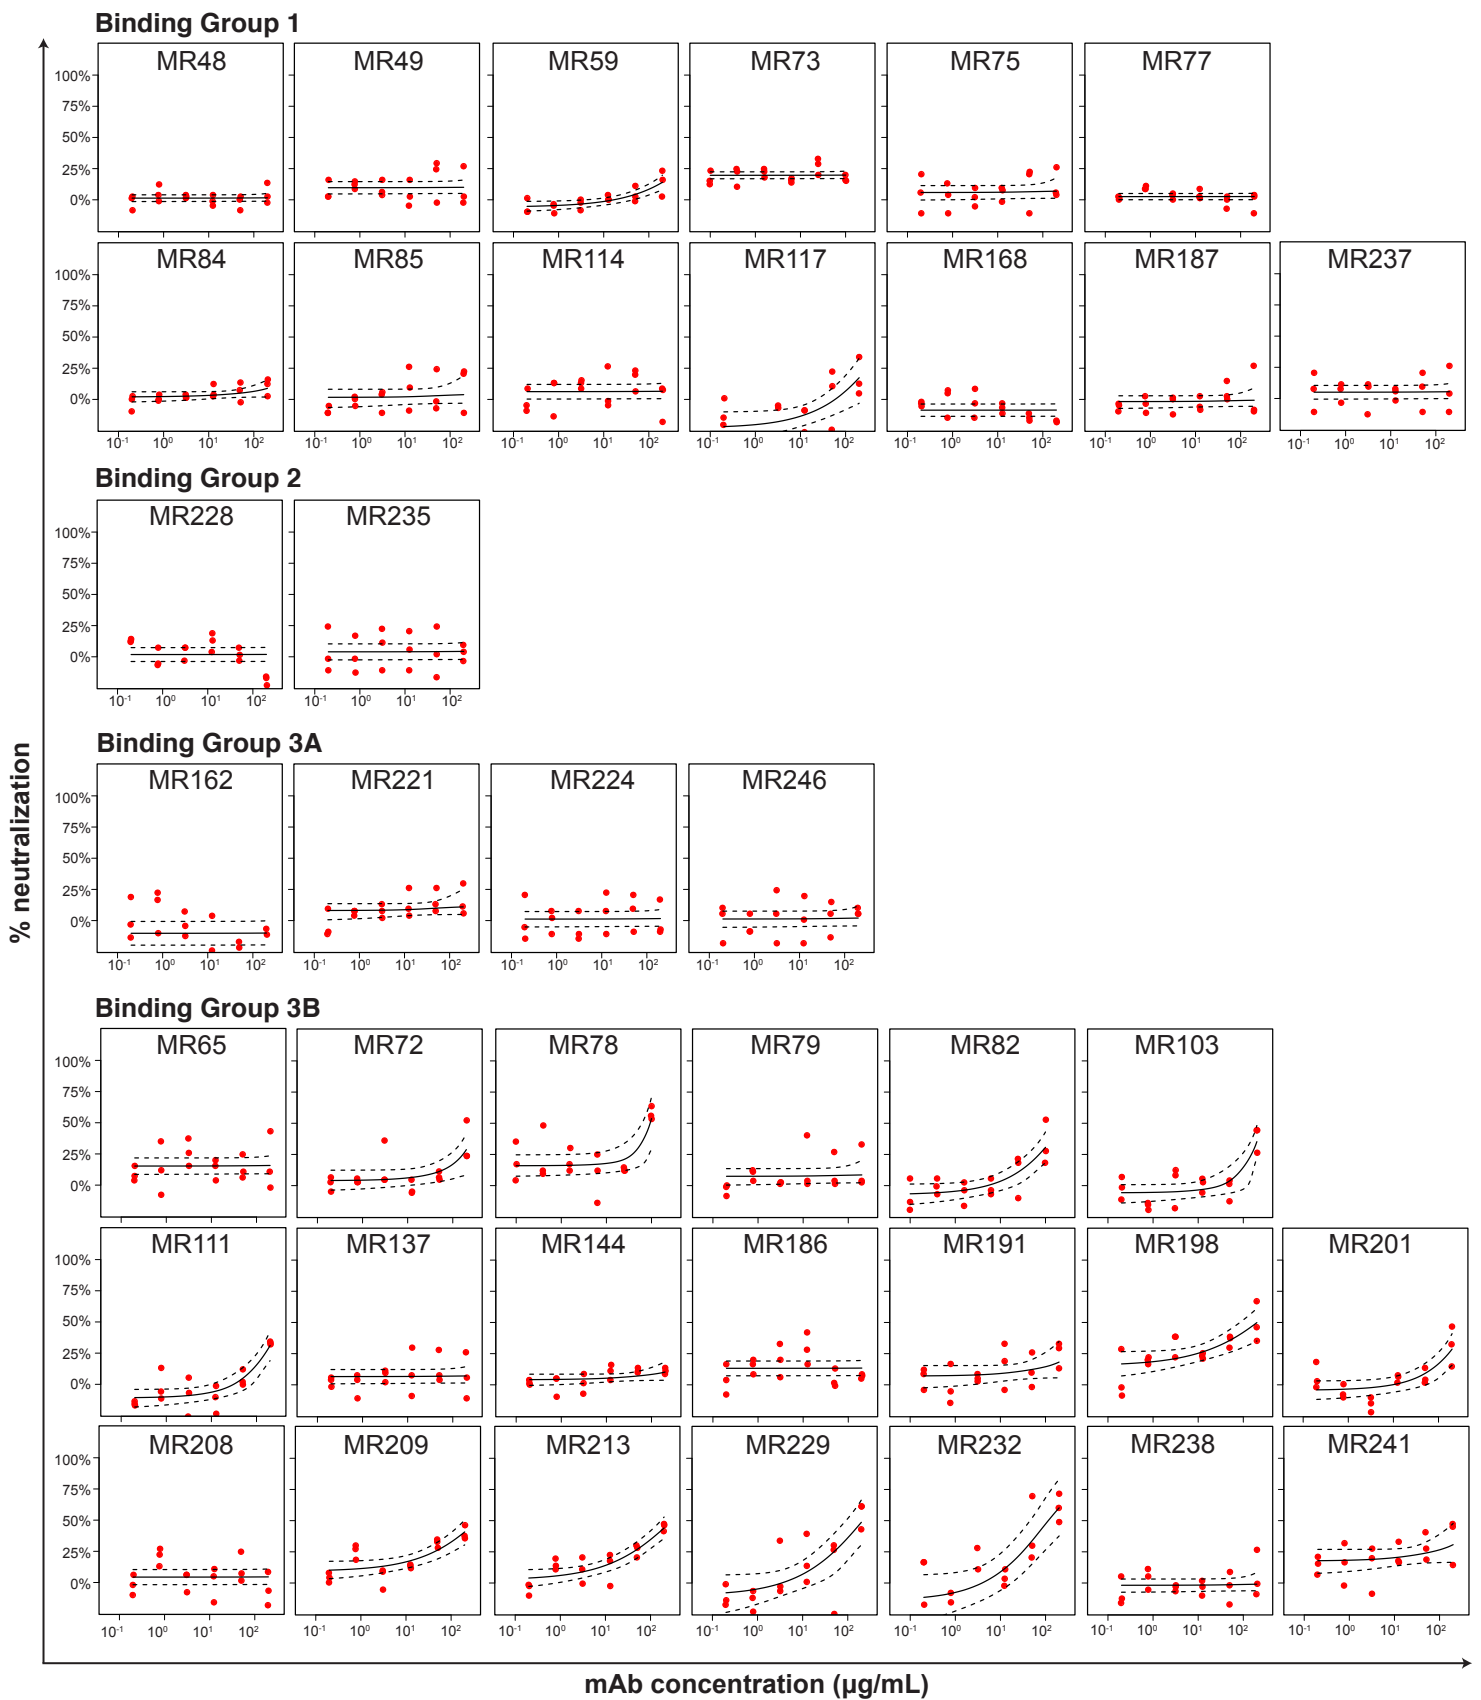

Supplement: NIHMS657867-supplement-3.pdf [file NIHMS657867-supplement-3.pdf]

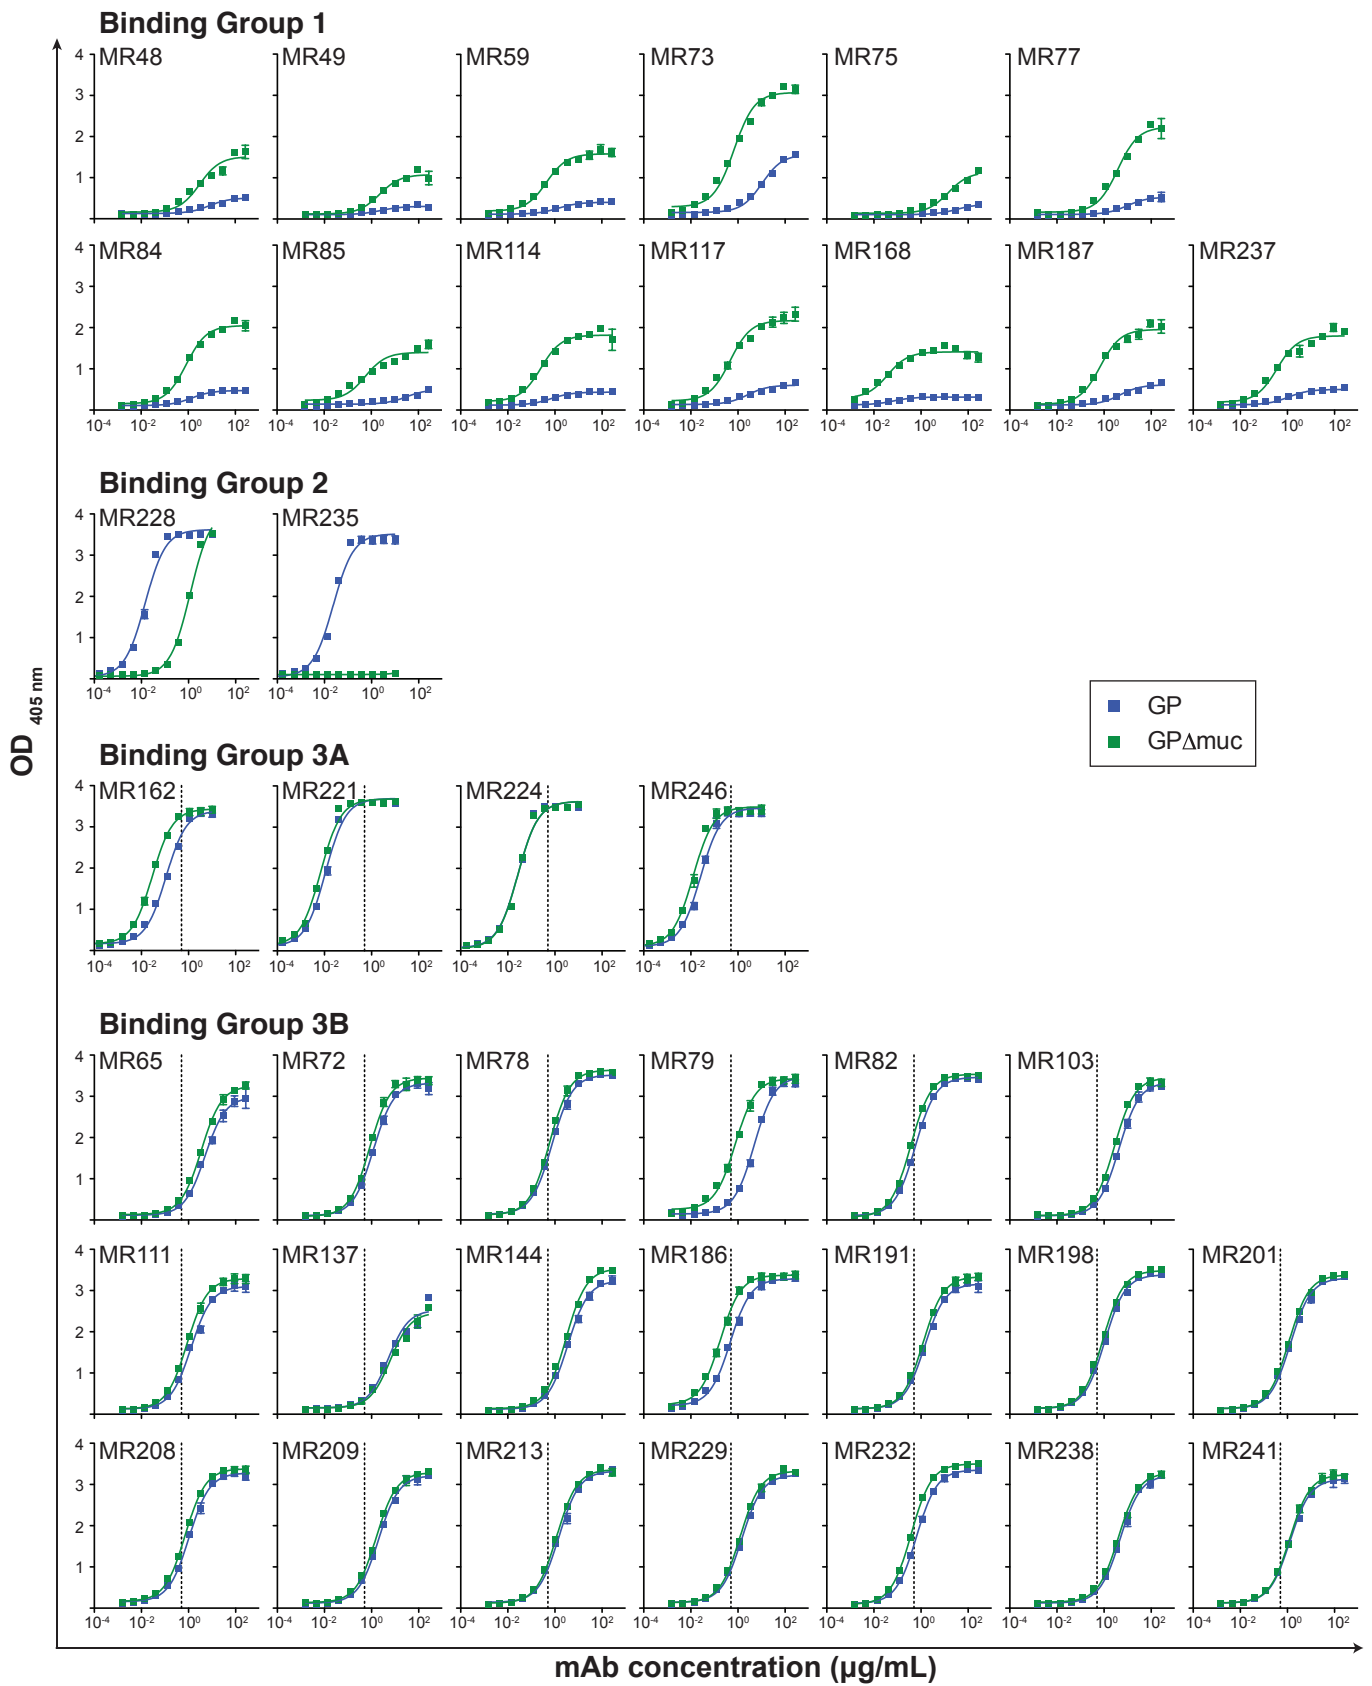

Supplement: NIHMS657867-supplement-5.pdf [file NIHMS657867-supplement-5.pdf]
